# Supplementary material for: Songwriting Group Music Therapy to promote psychological adjustment in informal caregivers of elderly people with dependency: a mixed methods study
Source: PubMed Central journal article supplement (PMC10953728; doi:10.3389/fpsyg.2024.1334875), 2024-03-06
Supplement: Table_1.pdf [file Table_1.pdf]

## Supplementary table 1

### Pre and post non-significative measures

| Scale                       | Pre (n=60)<br>M(SD) | Post (n=60)<br>M(SD) | Z      | p    |
|-----------------------------|---------------------|----------------------|--------|------|
| <b>STAI-S</b>               | 29.58 (11.75)       | 27.57 (11.42)        | -1.149 | .250 |
| <b>WHOQOL-SRPB</b>          |                     |                      |        |      |
| Connect                     | 2.18 (0.98)         | 2.28 (1.08)          | -0.946 | .344 |
| Meaning                     | 2.95 (0.93)         | 3.12 (0.83)          | -1.663 | .096 |
| Awe                         | 3.02 (0.72)         | 3.01 (0.68)          | -0.216 | .829 |
| Whole                       | 2.80 (0.79)         | 2.93 (0.78)          | -1.476 | .140 |
| Strenght                    | 2.48 (1.02)         | 2.6 (1.03)           | -1.381 | .167 |
| Hope                        | 2.97 (0.62)         | 3.02 (0.74)          | -0.650 | .516 |
| Faith                       | 2.38 (1.06)         | 2.52 (1.04)          | -1.675 | .094 |
| <b>ZARIT</b>                | 59.68 (14.45)       | 58.13 (14.93)        | -1.174 | .240 |
| <b>COPE-28</b>              |                     |                      |        |      |
| Active Coping               | 1.81 (0.57)         | 1.86 (0.54)          | -0.685 | .493 |
| Planning                    | 1.38 (0.59)         | 1.53 (0.58)          | -1.501 | .133 |
| Use of Emotional Support    | 1.57 (0.69)         | 1.63 (0.62)          | -0.487 | .626 |
| Use of Instrumental Support | 1.55 (0.61)         | 1.50 (0.63)          | -0.365 | .715 |
| Religion                    | 0.93 (0.74)         | 1.02 (0.82)          | -1.261 | .207 |
| Positive Reframing          | 1.15 (0.53)         | 1.22 (0.68)          | -0.828 | .407 |
| Acceptance                  | 1.86 (0.56)         | 1.89 (0.58)          | -0.471 | .638 |
| Denial                      | 0.55 (0.64)         | 0.63 (0.71)          | -0.611 | .541 |
| Humor                       | 0.54 (0.64)         | 0.52 (0.74)          | -0.601 | .548 |
| Self-distraction            | 1.39 (0.70)         | 1.43 (0.74)          | -0.428 | .669 |
| Self-blame                  | 0.60 (0.61)         | 0.58 (0.59)          | -0.229 | .819 |
| Behavioral Disengagement    | 0.33 (0.51)         | 0.26 (0.48)          | -1.217 | .224 |
| Venting                     | 1.01 (0.63)         | 1.00 (0.66)          | -.174  | .862 |
| Substance Use               | 0.08 (0.26)         | 0.07 (0.23)          | -0.707 | .480 |
| <b>SF-36</b>                |                     |                      |        |      |
| Physical Functioning        | 74.92 (23.08)       | 76.09 (21.94)        | -.336  | .737 |
| Role-Physical               | 48.75 (42.79)       | 57.50 (41.25)        | -1.344 | .179 |
| Bodily Pain                 | 50.92 (25.38)       | 55.13 (22.94)        | -1.156 | .248 |
| General Health              | 54.03 (21.92)       | 54.93 (21.44)        | -0.343 | .732 |
| Vitality                    | 49.33 (19.50)       | 52 (18.55)           | -1.421 | .155 |
| Role-emotional              | 52.78 (46.05)       | 54.45 (45.91)        | -0.299 | .765 |
| Physical Component          | 44.22 (10.61)       | 45.60 (9.73)         | -0.883 | .377 |
| Mental Component            | 37.18 (12.17)       | 38.78 (11.09)        | -1.156 | .248 |
