# Supplementary material for: Songwriting Group Music Therapy to promote psychological adjustment in informal caregivers of elderly people with dependency: a mixed methods study
Source: PubMed Central journal article supplement (PMC10953728; doi:10.3389/fpsyg.2024.1334875), 2024-03-06
Supplement: Table_2.pdf [file Table_2.pdf]

## Supplementary table 2

### Pre and follow-up non-significative measures

| Scale                       | Pre (n=60)<br>M(SD) | Follow-Up (n=50)<br>M(SD) | Z      | p    |
|-----------------------------|---------------------|---------------------------|--------|------|
| <b>WHOQOL-SRPB</b>          |                     |                           |        |      |
| Connect                     | 2.18 (0.98)         | 2.22 (1.04)               | -0.602 | .547 |
| Meaning                     | 2.95 (0.93)         | 3.11 (0.88)               | -1.153 | .249 |
| Awe                         | 3.02 (0.72)         | 3.15 (0.67)               | -0.530 | .596 |
| Strength                    | 2.48 (1.02)         | 2.60 (1.02)               | -0.129 | .897 |
| Hope                        | 2.97 (0.62)         | 2.99 (0.75)               | -0.634 | .526 |
| Faith                       | 2.38 (1.06)         | 2.52 (1.09)               | -0.721 | .471 |
| <b>COPE-28</b>              |                     |                           |        |      |
| Active Coping               | 1.81 (0.57)         | 1.76 (0.56)               | -0.446 | .656 |
| Planning                    | 1.38 (0.59)         | 1.54 (0.67)               | -1.686 | .092 |
| Use of Emotional Support    | 1.57 (0.69)         | 1.62 (0.59)               | -0.527 | .598 |
| Use of Instrumental Support | 1.55 (0.61)         | 1.41 (0.61)               | -1.396 | .163 |
| Religion                    | 0.93 (0.74)         | 0.95 (0.74)               | -0.365 | .693 |
| Positive Reframing          | 1.15 (0.53)         | 1.27 (0.65)               | -1.173 | .241 |
| Acceptance                  | 1.86 (0.56)         | 1.99 (0.70)               | -1.382 | .167 |
| Denial                      | 0.55 (0.64)         | 0.48 (0.53)               | -0.643 | .520 |
| Humor                       | 0.54 (0.64)         | 0.45 (0.59)               | -1.272 | .203 |
| Self-distraction            | 1.39 (0.70)         | 1.39 (0.64)               | -0.066 | .948 |
| Self-blame                  | 0.60 (0.61)         | 0.54 (0.57)               | -0.695 | .487 |
| Behavioral Disengagement    | 0.33 (0.51)         | 0.4 (0.55)                | -0.773 | .440 |
| Venting                     | 1.02 (0.63)         | 1.02 (0.64)               | -0.243 | .808 |
| Substance use               | 0.08 (0.26)         | 0.05 (0.21)               | -1.518 | .129 |
| <b>SF-36</b>                |                     |                           |        |      |
| Physical Functioning        | 74.92 (23.08)       | 76.30 (23.45)             | -0.669 | .503 |
| Role-Physical               | 48.75 (42.79)       | 55.50 (46.37)             | -1.363 | .173 |
| General Health              | 54.03 (21.92)       | 57.94 (21.37)             | -1.599 | .110 |
| Vitality                    | 49.33 (19.50)       | 52.50 (21.72)             | -1.081 | .280 |
| Role-Emotional              | 52.78 (46.05)       | 61.34 (44.85)             | -1.692 | .091 |
| Mental Health               | 52.40 (12.90)       | 54.64 (13.75)             | -1.264 | .206 |
| Physical Component          | 44.22 (10.61)       | 45.75 (10.68)             | -0.912 | .362 |
| Mental Component            | 37.18 (12.17)       | 39.32 (11.87)             | -1.955 | .051 |
